# Supplementary material
Source: Elsevier journal article supplement (https://www.sciencedirect.com/science/article/pii/S2444440520300248)
Supplement: mmc1 [file S2444440520300248:mmc1.docx]

**Supplementary material:**

1. **Search Strategies**

**MEDLINE PUBMED:**

("Scleroderma, Systemic"[Mesh] AND ("scleroderma renal crisis"[All Fields] OR ("hypertension"[All Fields] OR "acute renal failure"[All Fields])) AND (("Angiotensin-Converting Enzyme Inhibitors"[Mesh] OR "Angiotensin Receptor Antagonists"[Mesh] OR "Calcium Channel Blockers"[Mesh] OR "Endothelin Receptor Antagonists"[Mesh] OR "Labetalol"[All Fields] OR "minoxidil"[All Fields] OR "aliskiren"[All Fields]) OR ("prostacyclin analogues"[All Fields] OR "epoprostenol"[All Fields] OR "treprostinil"[All Fields] OR "iloprost"[All Fields] OR "beraprost"[All Fields]))

**EMBASE:**

('systemic sclerosis'/exp OR 'scleroderma renal crisis'/exp) AND ('dipeptidyl carboxypeptidase inhibitor'/exp OR 'angiotensin receptor antagonist'/exp OR 'prostacyclin derivative'/exp OR 'prostacyclin'/exp OR 'treprostinil'/exp OR 'iloprost'/exp OR 'beraprost'/exp OR 'labetalol'/exp OR 'minoxidil'/exp OR 'aliskiren'/exp) AND [embase]/lim NOT ([embase]/lim AND [medline]/lim)
